# Supplementary material
Source: Elsevier journal article supplement (https://www.sciencedirect.com/science/article/pii/S1579212912001243)
Supplement: mmc1 [file S1579212912001243:mmc1.doc]

**Appendix**: Complete questionnaire of the CONOCEPOC study

**QUESTIONNAIRE**

“Hello, I am calling you from a research center, and we are doing a study about health in the Spanish population. Would you mind answering some brief questions? It would only take 10 minutes. Thank you.”

SOCIODEMOGRAPHIC DATA

“Could you please answer…

S1.- what is your age?” _________

< 40 *** End of interview***

40-50

51-60

61-70

>70

S2. – “…and your weight?” __________Kg.

S3. – “How tall are you?” ________ meters.

S4.- Sex (determine without asking and according to their name, of possible):

Male

Female

S6.- Autonomous Community:

| Andalucía | Aragón |
| --- | --- |
| Asturias | C. Madrid |
| Canarias | Cantabria |
| Castilla-La Mancha | Castilla-León |
| Cataluña | Extremadura |
| Galicia | Islas Baleares |
| La Rioja | Navarra |
| País Vasco | R. Murcia |
| Valencia |  |
|  |  |

S7.- Setting*:

 10,000 inhabitants

> 10,000 inhabitants

KNOWLEDGE – COPD DIAGNOSIS

C1.- “On a scale from 0 (very bad) to 10 (very good), how do you feel your state of health is?” └┴┘

C2.- “Do you currently have a respiratory disease?”

Yes * Go to C3.*

No * Go to C4.*

Unsure* Go to C4.*

Spontaneous knowledge

C3.- “Which disease or diseases?” *(Do* ***Not*** *read options.)*

COPD (Chronic Obstructive Pulmonary Disease)

Asthma

Acute bronchitis

Chronic bronchitis

Pneumonia

Rhinitis

Pharyngitis

Emphysema

Cold / Flu

Other

*If COPD is* ***not*** *mentioned in C3, go to C4. If COPD is mentioned, go to C5.*

C4.- “Do you know what COPD (Chronic Obstructive Pulmonary Disease) is?”

Yes. “What are its main symptoms?” *(Do* ***not*** *read.)*

□ Morning cough □ Wheezing □ Expectoration

□ Breathlessness □ Other

No *(Go to C5.)*

“As you may know, COPD is a chronic obstructive pulmonary disease that involves a group of pathologies, such as chronic bronchitis and emphysema, and which is characterized by a feeling of breathlessness, wheezing and tiredness caused by smoking.”

*C5.-* “Now do you know COPD?” □ No □ Yes

C6.- “Where have you heard about COPD?”

□ Media (press, radio, TV)

□ Doctor

□ Pharmacist

□ Family member/friend with the disease

□ Other

Only ask about those that were **not** mentioned in C3.

C5.- Have you been diagnosed with any of the following diseases?

Yes No Don’t know

COPD

Asthma

Acute bronchitis

Chronic Bronchitis

Pneumonia

Rhinitis

Pharyngitis

Emphysema

*If COPD is* ***not*** *indicated in C3* ***and*** *C5, go to E1.*

COPD TREATMENT *(Only if* ***COPD*** *is mentioned in C3 or C5)*

T1.- “Are you being treated for COPD?”

□ No

□ Yes ** T2. Specific treatment *(read options)*:

□ Quit smoking:

“Have you been recommended a support treatment in order to quit smoking?” (pills, patches, etc.)

□ No □ Yes

□ Medication

□ Exercise / rehabilitation

□ Oxygen

□ Other

T2.- “What symptom are you most worried about or bothers you the most with your COPD?”

                □ Cough     □ Wheezing □ Expectoration     □ Breathlessness     □ Other

T3.- “Do any of these COPD symptoms bother you when sleeping at night?”

□ No     □ Yes: “How?” *(multiple answer)*

                                   □ I wake up many times at night.

                                   □ I wake up tired in the morning.

                                   □ My sleep quality is poor.

                                   □ Other

T4.- “When your COPD is worse (for instance more cough, breathlessness or change in sputum), do you go to the doctor?”

□ No     □ Only if I feel very ill or have fever.     □ Yes

COPD CHARACTERISTICS *(all interviewees)*

P1.- “Do you smoke?”

□ Yes, smoker P.1.1.1.- “How many cigarettes do you smoke a day?”_________

P.1.1.2.- “How many years have you smoked?” _________

P.1.1.3.- “Have you ever tried to quit smoking?”

□ Yes  P1.1.4.- “How many times?” _____________

□ No

□ No, ex-smoker P.1.2.1 “When did you quit?”

□ less than 6 month ago □ more than 6 months ago

P.1.2.2.- “How many cigarettes did you smoke a day?” ________

P.1.2.3.- “How many years did you smoke?” ____________

□ No, never-smoker

P2.- “For at least the last 2 years, have you had morning cough in a more or less uninterrupted manner, for more than 3 months a year?”

□ Yes □ No

P3.- “For at least the last 2 years, have you had cough with expectoration (cough that produces sputum), in a more or less uninterrupted manner, for more than 3 months a year?”

□ Yes □ No

P4.- “Do you wheeze or make noise when breathing, in a more or less uninterrupted manner, for more than 3 months a year?”

□ Yes □ No

P5.- “Do you feel a conscious sensation of breathlessness (it is more difficult to inhale than to exhale)?” *(Read options.)*

□ No

□ When climbing a hill or 2 flights of stairs.

□ When climbing one flight of stairs.

□ When walking on a flat area.

□ At rest.

*If some of the following symptoms are indicated: Yes in P2, P3, P4 or if No was* ***not*** *answered in P5*

P5.- “Have you consulted with your doctor for these problems?” *(If necessary, mention cough, cough with sputum and or breathlessness.)*

□ No

□ Yes: “With whom?”

□ primary care physician

□ respiratory disease specialist

“Have they ever tested you with spirometry? (blowing through a device?”

□ No □ Yes

PERCEPTION of COPD

F1.- “On a scale from 0 (not severe) to 10 (extremely severe), how severe would you consider COPD? _________

F2.- “Would you be so kind as to indicate, on a scale of 0 (not severe) to 10 (extremely severe), how you consider the severity of each of the following diseases?

Diabetes……………. _____

Hypertension……….. _____

Angina …….…... _____

Stomach ulcer………._____

Osteoarthritis/Arthritis… _____

F3.- “Taking effect on January 2nd of this year, there is a new Anti-Tobacco Law in Spain, which does not allow smoking in enclose public places, among other changes. What is your attitude towards the new law?”

□ Very favorable

□ Favorable

□ Don’t know

□ Unfavorable

□ Very unfavorable

F4.- “Did you know that there is a National COPD Strategy?”

□ No □ Yes

**Thank you very much for your collaboration**
